# Supplementary material for: From Prior Beliefs to Lineup Truths: Bayesian Inference for Lineup Performance
Source: Research Square preprint supplement (doi:10.21203/rs.3.rs-8714352/v1), 2026-02-03
Supplement: Supplementary file 1 [file 66bfde32af96cc8c4e1c38ba.pdf]

# 1 Supplementary Information

The following figures present our results for the relative absolute error  $\varepsilon_r$  for all the different strengths of the prior examined.

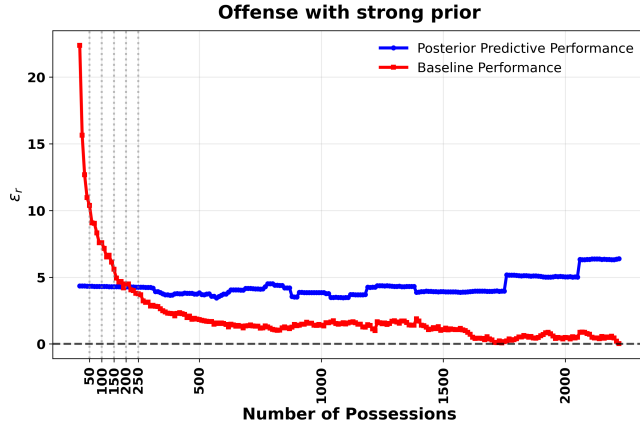

(a) Offense ( $X = 0.01$ )

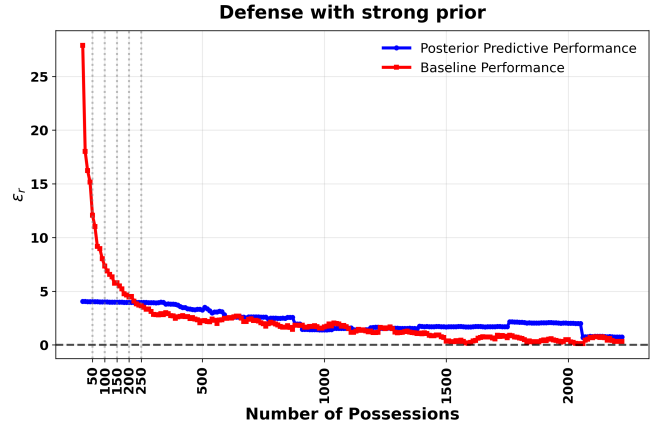

(b) Defense ( $X = 0.01$ )

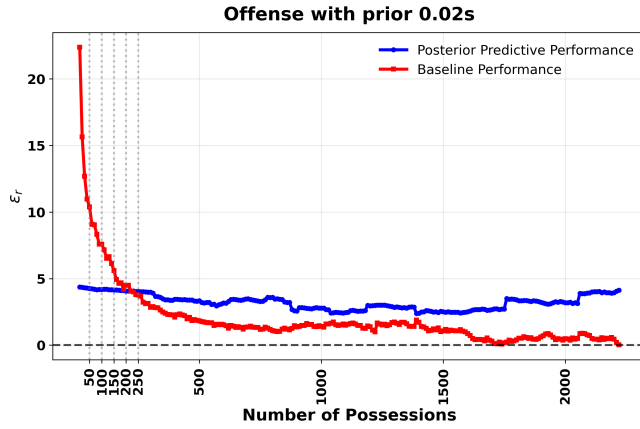

(c) Offense ( $X = 0.02$ )

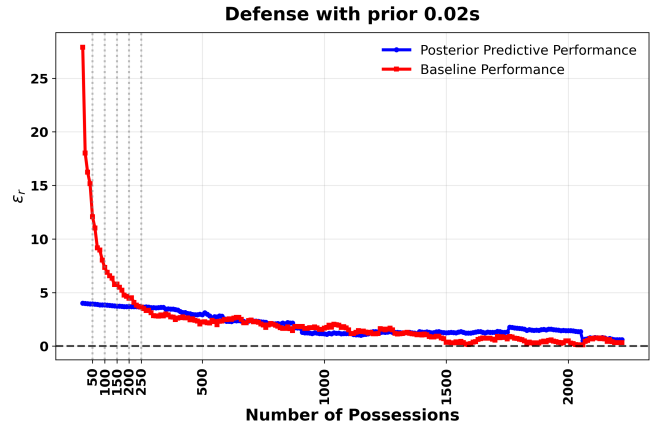

(d) Defense ( $X = 0.02$ )

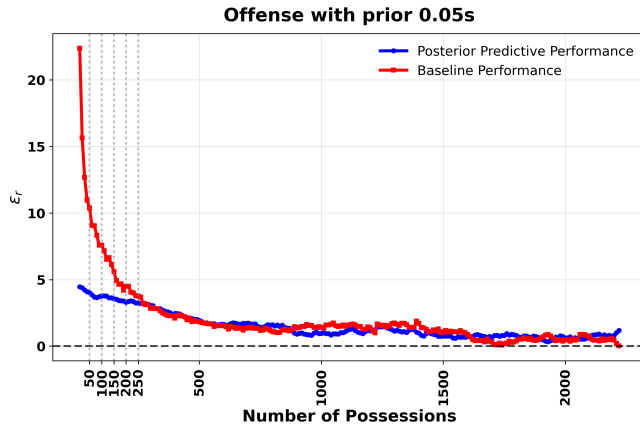

(e) Offense ( $X = 0.05$ )

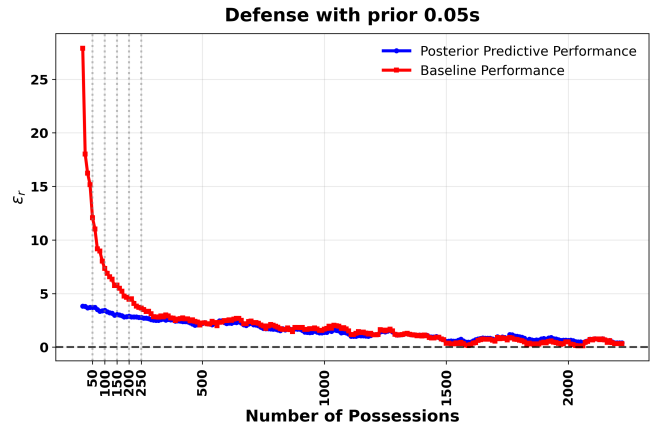

(f) Defense ( $X = 0.05$ )

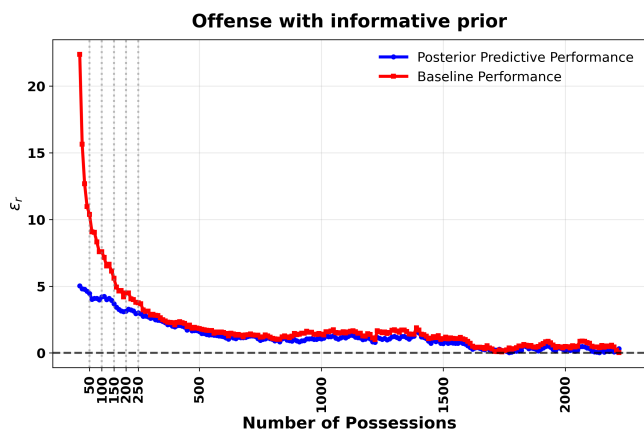

(a) Offense ( $X = 0.1$ )

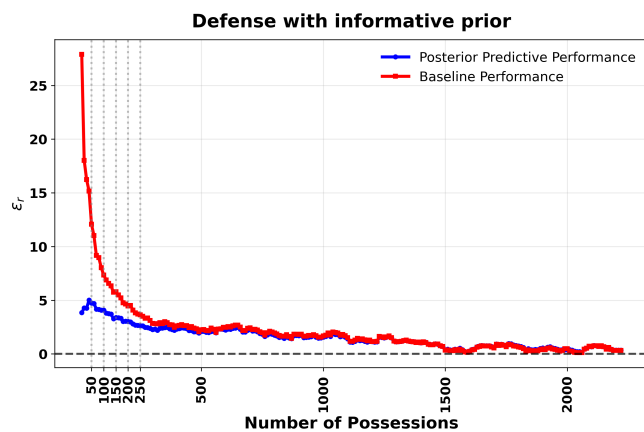

(b) Defense ( $X = 0.1$ )

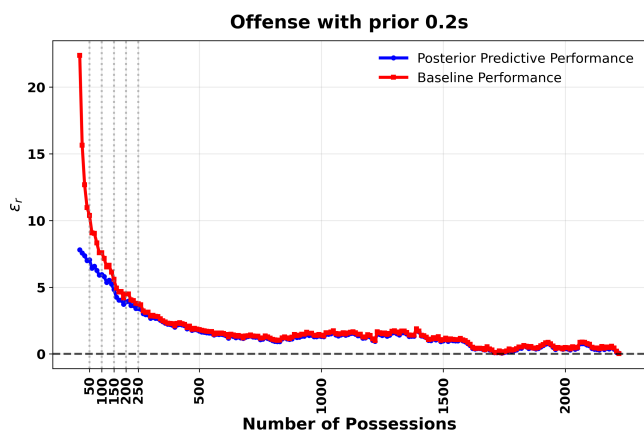

(c) Offense ( $X = 0.2$ )

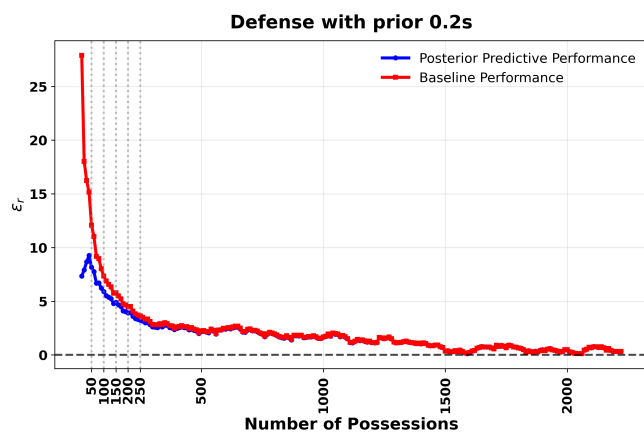

(d) Defense ( $X = 0.2$ )

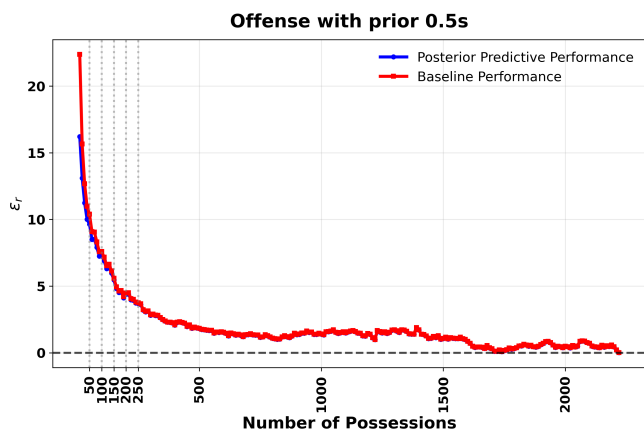

(e) Offense ( $X = 0.5$ )

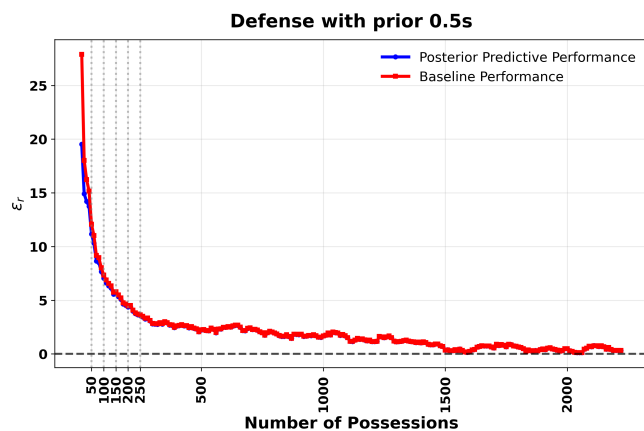

(f) Defense ( $X = 0.5$ )

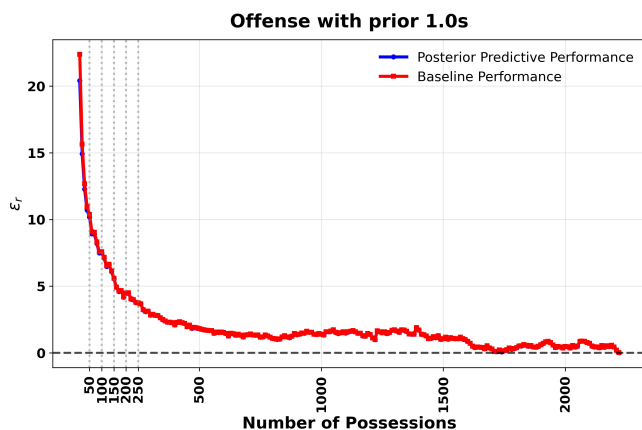

(a) Offense ( $X = 1.0$ )

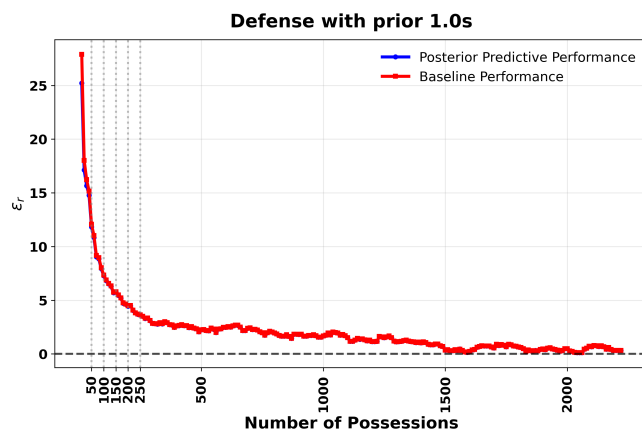

(b) Defense ( $X = 1.0$ )

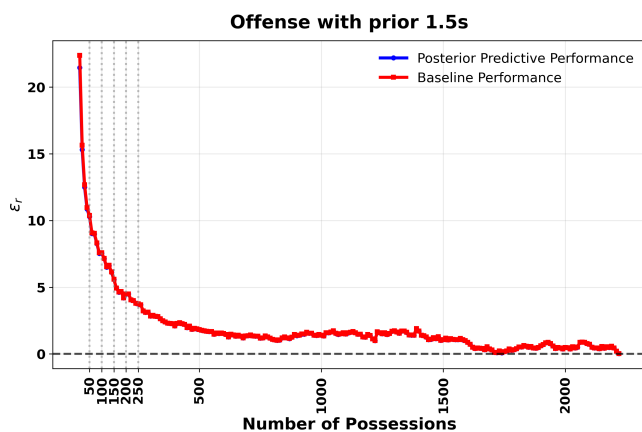

(c) Offense ( $X = 1.5$ )

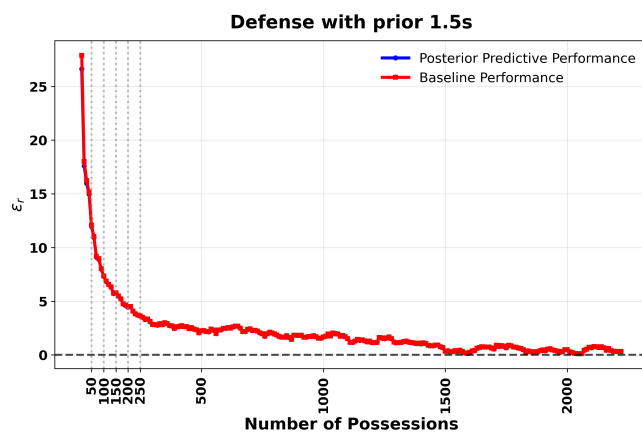

(d) Defense ( $X = 1.5$ )

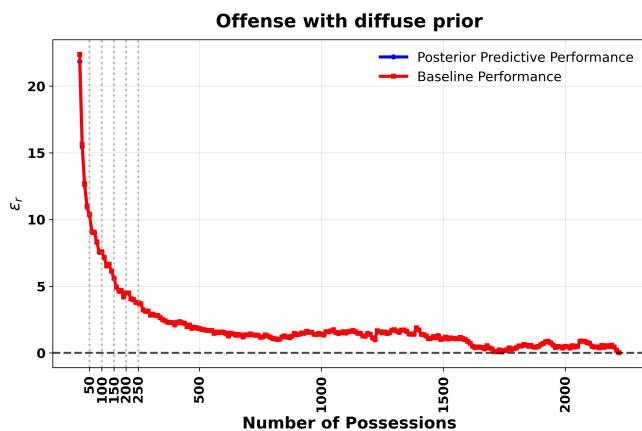

(e) Offense ( $X = 2.0$ )

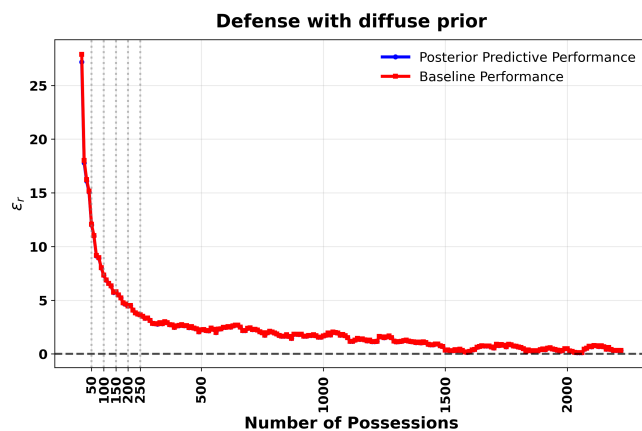

(f) Defense ( $X = 2.0$ )

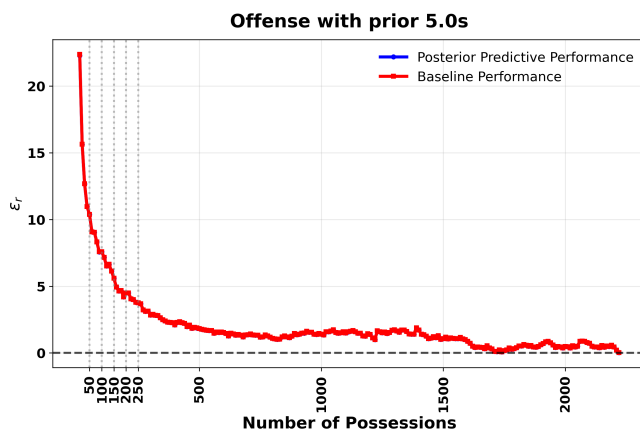

(a) Offense ( $X = 5.0$ )

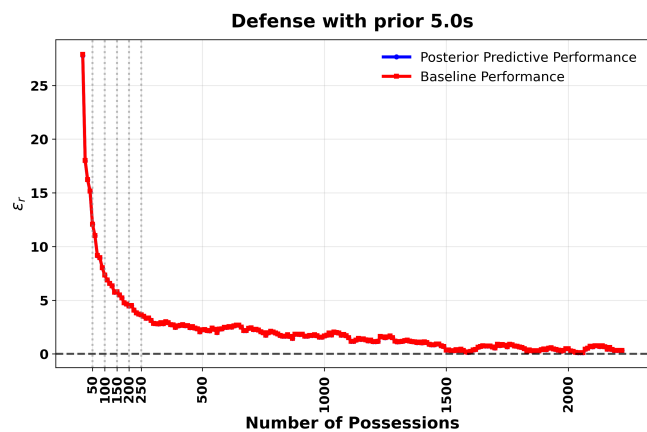

(b) Defense ( $X = 5.0$ )

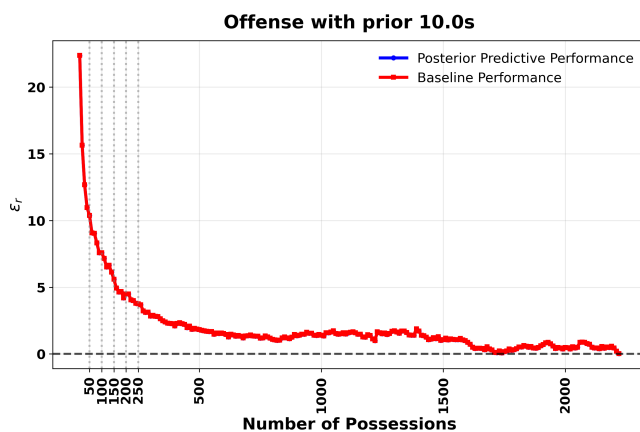

(c) Offense ( $X = 10.0$ )

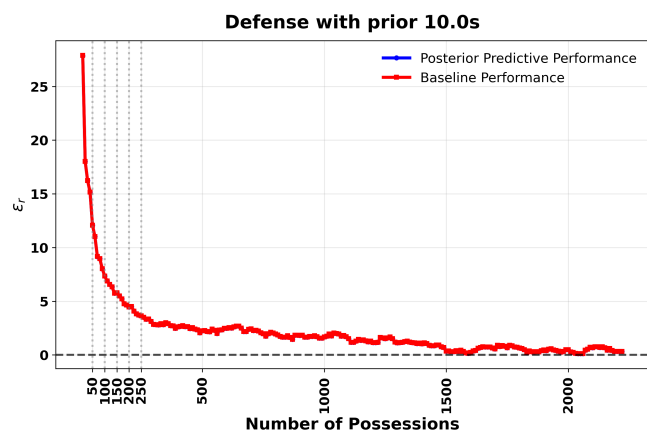

(d) Defense ( $X = 10.0$ )

**Absolute relative error for different strengths of prior.** Each row corresponds to a single value of the prior's standard deviation, with the results for the performance on predicting the offense shown on the left and that for defense on the right.
